1  
2  
3  
4  
5  
6  
7  
8  
9  
10  
11  
12  
13  
14  
15

**Title:**

**More than noise: Context-dependant luminance contrast discrimination in a coral reef fish (*Rhinocanthus aculeatus*)**

**Running title:**

**Luminance contrast discrimination in reef fish**

Authors: Cedric P. van den Berg<sup>1,3\*</sup>, Michelle Hollenkamp<sup>2</sup>, Laurie J. Mitchell<sup>1,3</sup>, Erin J. Watson<sup>1</sup>,  
Naomi F. Green<sup>1</sup>, N. Justin Marshall<sup>3</sup>, Karen L. Cheney<sup>1,3</sup>

<sup>1</sup> *School of Biological Sciences, The University of Queensland, Brisbane, QLD 4072, Australia*

<sup>2</sup> *Department of Ecology and Evolutionary Biology, University of Colorado Boulder, Boulder, CO 80309, USA*

<sup>3</sup> *Queensland Brain Institute, The University of Queensland, Brisbane, QLD 4072, Australia*

*\*corresponding author: c.vandenberg@uq.edu.au*

## 16 **Abstract**

17           Achromatic (luminance) vision is used by animals to perceive motion, pattern, space and  
18 texture. Luminance contrast sensitivity thresholds are often poorly characterised for individual  
19 species and are applied across a diverse range of perceptual contexts using over-simplified  
20 assumptions of an animal's visual system. Such thresholds are often estimated using the Receptor  
21 Noise Limited model (RNL) using quantum catch values and estimated noise levels of  
22 photoreceptors. However, the suitability of the RNL model to describe luminance contrast  
23 perception remains poorly tested.

24           Here, we investigated context-dependent luminance discrimination using triggerfish  
25 (*Rhinecanthus aculeatus*) presented with large achromatic stimuli (spots) against uniform  
26 achromatic backgrounds of varying absolute and relative contrasts. 'Dark' and 'bright' spots were  
27 presented against relatively dark and bright backgrounds. We found significant differences in  
28 luminance discrimination thresholds across treatments. When measured using Michelson  
29 contrast, thresholds for bright spots on a bright background were significantly higher than for  
30 other scenarios, and the lowest threshold was found when dark spots were presented on dark  
31 backgrounds. Thresholds expressed in Weber contrast revealed increased contrast sensitivity for  
32 stimuli darker than their backgrounds, which is consistent with the literature. The RNL model was  
33 unable to estimate threshold scaling across scenarios as predicted by the Weber-Fechner law,  
34 highlighting limitations in the current use of the RNL model to quantify luminance contrast  
35 perception. Our study confirms that luminance contrast discrimination thresholds are context-  
36 dependent and should therefore be interpreted with caution.

37

## 38 **Keywords**

39 Receptor Noise Limited Model, experimental psychophysics, perceptual thresholds, visual  
40 ecology, visual modelling

41

## 42 **Introduction**

43 The perception of chromatic (colour) and achromatic (luminance) information from the  
44 surrounding environment enables animals to perform complex behaviours such as navigation,  
45 mate choice, territorial defence, foraging and predator avoidance. Chromatic information is  
46 largely used to assess the spectral composition and quality of objects or other organisms (Osorio  
47 and Vorobyev, 2005), whereas achromatic information is predominantly used for object grouping,  
48 pattern and texture detection, figure-ground segregation, and the perception of motion and  
49 depth (Anderson, 2011; Brooks, 2014; Elder and Sachs, 2004; Elder and Velisavljevic, 2010;  
50 Gilchrist, 2008; Gilchrist and Radonjic, 2009).

51 Behavioural experiments to examine colour and luminance discrimination thresholds  
52 enable inferences on the perception of visual information by non-human observers (for discussion  
53 see Olsson et al., 2018). Thresholds may be influenced by spatiotemporal and spatiochromatic  
54 properties of a visual scene, as the perception of colour, pattern, luminance and motion interact  
55 when low-level retinal information is processed along pathways in the visual cortex (Monnier and  
56 Shevell, 2003; Shapley and Hawken, 2011; Shevell and Kingdom, 2008), or at even earlier stages  
57 (Heath et al., 2020; Zhou et al., 2020). For example, the perception of luminance contrast in  
58 animals is influenced by a range of factors, including perceived illumination and reflectance

59 (which in turn depend on illumination) in addition to various spatial and temporal properties,  
60 such as depth perception, adaptation, stimulus geometry and viewer expectation of the position  
61 and shape of a stimulus (Corney and Lotto, 2007; Craik, 1938; Gilchrist and Radonjic, 2009;  
62 Heinemann and Chase, 1995; Kingdom, 2011; Lind et al., 2012; Pelli and Bex, 2013). The impact  
63 of post-photoreceptor, and particularly post-retinal neuronal processing, on luminance  
64 perception is often illustrated by visual displays targeting these effects, such as simultaneous  
65 contrast illusions (Fig. 1). To investigate the design, function and evolution of animal visual signals,  
66 the context sensitivity of visual threshold measurement is important to define.

67

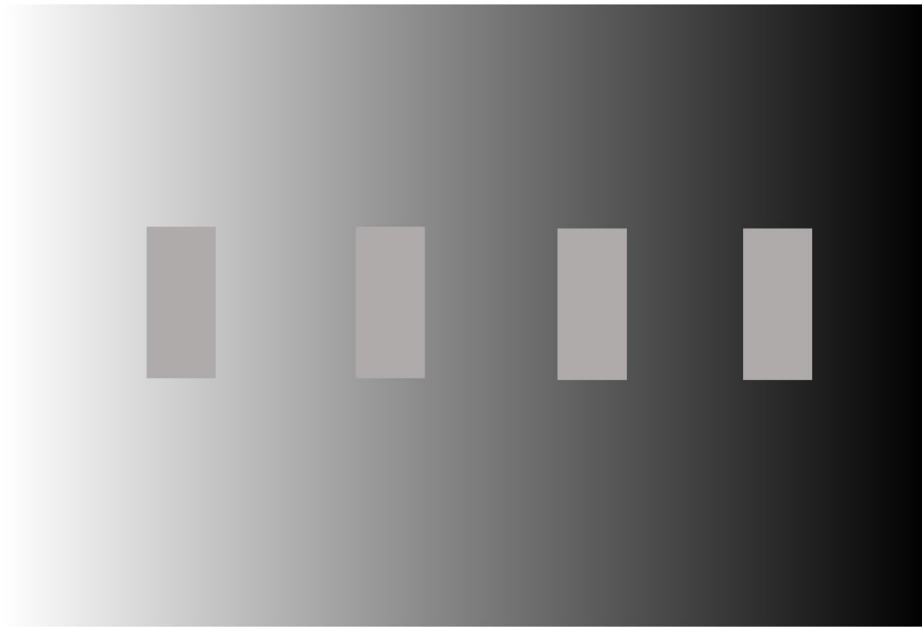

**Figure 1:** The simultaneous contrast effect: despite having identical luminance, the left most internal square appears darker than the right one as a result of the background contrast against which they each square is viewed.

68

69 Luminance contrast of objects against their visual background or between objects can be  
70 measured in a number of different ways, including Michelson contrast (MC), Weber contrast (WC)  
71 and Root Mean Square (RMS) (Bex and Makous, 2002; Moulden et al., 1990; Vorobyev and Osorio,  
72 1998). MC is commonly used to describe the contrast between two comparably sized objects or  
73 sine gratings (Bex and Makous, 2002; Pelli and Bex, 2013). The WC, particularly popular in  
74 psychophysics, is designed to describe the contrast of an object against a dominating background,  
75 while accounting for the Weber-Fechner law that states that psychometric thresholds scale with  
76 stimulus intensity at a constant ratio: the Weber fraction (Dzhafarov and Colonius, 1999; Norwich,  
77 1987; Treisman, 1964). Luminance discrimination thresholds in animals have been obtained from  
78 behavioural experiments and measured in MC, and most commonly in WC (e.g. Lind et al., 2013;  
79 Scholtyssek et al., 2008). For example, human luminance discrimination thresholds are between  
80 0.11 and 0.14 WC (Cornsweet and Pinsker, 1965), which is similar to seals (0.11-0.14 WC)  
81 (Scholtyssek and Dehnhardt, 2013; Scholtyssek et al., 2008). Other animals have poorer  
82 luminance discrimination thresholds, including birds (0.18-0.22 WC) (Lind et al., 2013), dogs (0.22-  
83 0.27 WC) (Pretterer et al., 2004), manatees 0.35 WC (Griebel and Schmid, 1997) and horses (0.42-  
84 0.45 WC) (Geisbauer et al., 2004).

85 Behavioural experiments measuring discrimination thresholds are often time-consuming  
86 and unfeasible, especially when studying non-model organisms. Furthermore, focal species may  
87 not be suitable for behavioural testing due to ethical, legal or logistical restrictions. Therefore, in  
88 studies on visual ecology, the 'Receptor Noise Limited' (RNL) model (Vorobyev and Osorio, 1998)  
89 has been adopted as a means of estimating whether both colour and luminance contrast within  
90 and between animal colour patterns, or between animals and their backgrounds, are perceivable

91 to a species The model was initially designed for colour contrast modelling; however, the  
92 achromatic interpretation of the RNL model (Siddiqi, 2004).has been used in a large number of  
93 studies to quantify the perception of luminance contrast by non-human observers (e.g. Cheney  
94 and Marshall, 2009; Marshall et al., 2016; Spottiswoode and Stevens, 2010; Stoddard and Stevens,  
95 2010; Troscianko and Stevens, 2015). In contrast to using WC or MC, the RNL model allows the  
96 prediction of contrast discriminability without the need of behavioural experimentation, but  
97 instead can even be applied using conservatively chosen estimates of vision parameters (Olsson  
98 et al., 2018).

99         The RNL model assumes that signal discrimination under ‘ideal viewing conditions’ is  
100 limited by noise originating in the receptors and subsequent opponent processing (Vorobyev and  
101 Osorio, 1998; Vorobyev et al., 2001). It was designed to estimate when a signal receiver could  
102 discriminate between two colours that were spectrally similar, adjacent, of fixed size and  
103 luminance. The point at which the contrast between two stimuli surpasses a behaviourally  
104 determined threshold (e.g. 75% correct choice in a pairwise choice paradigm) is then expressed  
105 as a ‘Just Noticeable Difference’ (JND) corresponding to a Euclidian distance ( $\Delta S$ ) in an  $n$ -  
106 dimensional space, where  $n$  is the number of colour or luminance processing channels (Hempel  
107 de Ibarra et al., 2001). The model predicts a JND is equal to 1  $\Delta S$  if all model assumptions (ideal  
108 viewing conditions) are met (Vorobyev and Osorio, 1998; Vorobyev et al., 2001).

109         However, in many animals, the neuronal pathways leading to the perception of luminance  
110 contrast vary significantly from those involved in the perception of colour contrast. In humans for  
111 example, the magnocellular and parvocellular pathways segregate colour and luminance tasks  
112 (Zeki, 1993) which can interact (to varying degrees) during subsequent neuronal processing (e.g.

113 Bruce et al., 2010; Gegenfurtner and Kiper, 1992; Shapley and Hawken, 2011; Simmons and  
114 Kingdom, 2002; Webster and Wilson, 2000). The pronounced context-dependent sensitivity of  
115 luminance contrast perception is partly due to the fact that achromatic vision in vertebrates lacks  
116 a process as efficient as colour constancy (Kelber et al., 2003; Land, 1986; Osorio and Vorobyev,  
117 2008; Wallach, 1948) which enables the perceived color of objects to remain relatively constant  
118 under varying illumination conditions (but see Lotto and Purves, 2000; Simpson et al., 2016).  
119 However, despite assuming receptor noise levels to be the limiting factor shaping both chromatic  
120 and achromatic contrast perception, behavioural validations of perceptual distances calculated  
121 using the RNL model are required in various visual contexts (as suggested by Olsson, Lind, &  
122 Kelber, 2018 but see Skorupski & Chittka, 2011; Vasas, Brebner, & Chittka, 2018). Olsson et al.  
123 (2018) have further suggested a conservative threshold of up to 1 JND = 3  $\Delta S$  for colour  
124 discrimination, as both parameter choice and behavioural threshold validation are often difficult.  
125 The use of such conservative chromatic discrimination thresholds in perceptually complex  
126 contexts has recently been supported by empirical work (Escobar-Camacho et al., 2019; Sibeaux  
127 et al., 2019). However, no empirical evidence exists for choosing conservative luminance  
128 (achromatic) contrast thresholds using the RNL model.

129 In this study, we performed behavioural experiments with triggerfish, *Rhinecanthus*  
130 *aculeatus*, to determine luminance discrimination thresholds in a foraging task using large stimuli  
131 under well-illuminated (photopic) conditions. We refer to the task of discriminating a stimulus  
132 from its background as a detection task, as this reflects a common use of the achromatic RNL  
133 model in visual ecology, most prominently when quantifying the efficiency of animal camouflage  
134 (e.g. Troscianko *et al.*, 2016). The ability to detect the presence of a potential prey item is the pre-

135 requisite for more complex cognitive processes and decision making by a predator (Endler, 1991)  
136 and as such more likely to reflect low-level retinal and post-retinal properties of visual contrast  
137 processing, such as the ones the RNL model has been developed to reflect.

138 Fish were trained to first locate a target spot that was randomly placed on an achromatic  
139 background from which the spot differed in terms of luminance, and then peck it to receive a food  
140 reward. Luminance discrimination thresholds were measured for both increasing and decreasing  
141 luminance, on both a relatively bright and a dark background. We report thresholds in terms of  
142 Michelson and Weber contrast, but then translate these thresholds into achromatic  $\Delta S$  using the  
143 log transformed RNL model, as per Siddiqi *et al.* (2004). To our knowledge, this is the first time  
144 that achromatic discrimination thresholds have been quantified in a marine vertebrate, using a  
145 ‘detection’ task (as opposed to a pairwise choice paradigm as in Siebeck *et al.*, (2014)) as well as  
146 doing so using animals which have been trained to detect both randomly placed brighter and  
147 darker stimuli simultaneously.

148

## 149 **Materials and methods**

### 150 **Study species**

151 We used triggerfish *Rhinecanthus aculeatus* ( $n = 15$ ), which ranged in size from 6 to 16 cm  
152 (standard length, SL). This species inhabits shallow tropical reefs and temperate habitats  
153 throughout the Indo-Pacific and feeds on algae, detritus and invertebrates (Randall *et al.*, 1997).  
154 They are relatively easy to train for behavioural studies (e.g. Green *et al.*, 2018), and their visual  
155 system has been well-studied (Champ *et al.*, 2014; Champ *et al.*, 2016; Cheney *et al.*, 2013;



156 Pignatelli et al., 2010). They have trichromatic vision based on one single cone, containing short-  
157 wavelength sensitive visual pigment (sw photoreceptor  $\lambda_{\max} = 413$  nm); and a double cone, which  
158 houses the medium-wavelength sensitive pigment (mw photoreceptor  $\lambda_{\max} = 480$  nm) and long-  
159 wavelength sensitive pigment (lw photoreceptor  $\lambda_{\max} = 528$  nm) (Cheney et al., 2013). The double  
160 cone members are used independently in colour vision (Pignatelli et al., 2010), but are also  
161 thought to be used in luminance vision (Marshall et al., 2003; Siebeck et al., 2014), as per other  
162 animals such as birds and lizards (Lythgoe, 1979).

163           However, it is not clear if both members of the double cone are used for luminance  
164 perception via electrophysiological coupling (Marchiafava, 1985; Siebeck et al., 2014). We have  
165 based our experiment on the assumption of both members contributing as per previous studies  
166 modelling luminance perception in *R. aculeatus* (Mitchell et al., 2017; Newport et al., 2017). These  
167 studies have used the added input of both double cone members (mw + lw), whereas our study  
168 uses the averaged output of both members (mw + lw / 2) as suggested by Pignatelli & Marshall,  
169 (2010) and Pignatelli et al., (2010). Additionally, Cheney et al., (2013) have used the lw receptor  
170 response rather than both double cone members for luminance contrast modelling in *R.*  
171 *aculeatus*, based on discussions in Marshall et al., (2003). However, MC/WC/ $\Delta S$  contrast values  
172 are identical for  $f_{t/b} = mw + lw$  and  $f_{t/b} = mw + lw / 2$  (eq. 2). Using the lw member of the double  
173 cone only (as opposed to both members) causes less than 1% difference (well below  
174 measurement error) in receptor stimulation due to the lack of chromaticity of the stimuli and the  
175 strong overlap of spectral sensitivities of both double cone members (Cheney et al., 2013).

176           Fish were obtained from an aquarium supplier (Cairns Marine Pty Ltd, Cairns), shipped to  
177 The University of Queensland, Brisbane and housed in individual tanks of 120L (W: 40cm; L: 80

178 cm, H: 40cm). They were acclimatised for at least one week before training commenced.  
179 Experiments were conducted in September-November 2017. All experimental procedures for this  
180 study were approved by the University of Queensland Animal Ethics Committee  
181 (SBS/111/14/ARC).

## 182 **Stimulus creation and calibration**

183 We used a custom programme in Matlab (MathWorks, 2000) to create the stimuli  
184 (available on [GitHub](#)). This programme allowed us to specify the RGB values of the background  
185 and target spot, and randomly allocate the target spot (1.6cm diam) to a position on the  
186 background. The size of spot was chosen to be well within the spatial acuity of *R. aculeatus*  
187 (Champ et al., 2014) and could be easily resolved by the fish from anywhere in their aquaria.  
188 Stimuli, distractors and backgrounds were printed on TrendWhite ISO 80 A4 recycled paper using  
189 a HP Laserjet Pro 400 color M451dn printer. Stimuli were then laminated using matte laminating  
190 pouches. Throughout the experiment, any stimuli with detectable scratches or damage were  
191 replaced immediately.

192 To ensure all stimuli were achromatic, reflectance measurements were plotted in colour  
193 space as per Cheney et al. (2019). Target and background colours were  $< 1 \Delta S$  from the achromatic  
194 locus in the RNL colour space as per equations 1-4 in Hempel de Ibarra et al. (2001).  
195 Photoreceptor stimulation was calculated using spectral sensitivities of triggerfish from Cheney  
196 et al. (2013). Measures of photoreceptor noise are not available in this species, therefore we  
197 assumed a cone ratio of 1:2:2 (SW:MW:LW) with a standard deviation of noise in a single cone of  
198 0.05 as per (Champ et al., 2016; Cheney et al., 2019). The cone abundance was normalised relative

199 to the LW cone, which resulted in channel noise levels (univariant Weber fractions) of  
200 0.07:0.05:0.05 (SW:MW:LW).

201 We quantified luminance contrast using calibrated digital photography (Stevens et al.,  
202 2007) using an Olympus E-PL5 Penlight camera fitted with a 60mm macro lens to take pictures of  
203 each stimulus combination (Suppl. material). Two EcoLight KR96 30W white LED lights (Eco-lamps  
204 Inc. – Hong Kong) were used to provide even illumination between 400-700nm wavelength  
205 (Suppl. Material). Pictures were analysed using the ‘Multispectral Image Calibration and Analysis’  
206 (MICA) Toolbox (Troscianko and Stevens, 2015) to calculate cone capture quanta of the double  
207 cone. The double cone stimulation was calculated as the average stimulation of the medium-  
208 wavelength (MW) and long-wavelength (LW) cone, as per Pignatelli *et al.* (2010). We used a  
209 spatial acuity estimation of 2.75 cycles per degree (Champ et al., 2014) at 15cm viewing distance  
210 using AcuityView (Caves and Johnsen, 2018) implemented in MICA’s QCPA package (van den Berg  
211 et al., 2020).

212 Stimulus contrast was measured as Michelson contrast using the MICA derived cone catch  
213 values of the double cones. The stimuli contrasts were evenly spaced around an area of interest  
214 in which the threshold was expected to lie, according to pilot trials. Weber contrast of the  
215 thresholds was calculated as  $\Delta I_t / I_s$ ; where  $\Delta I_t$  is the stimulus contrast at threshold and  $I_s$  is the  
216 intensity of the distractor or background respectively as per Lind *et al.*, (2013). Achromatic  $\Delta S$   
217 values were calculated according to equation 7 in Siddiqi *et. al* (2004) (Eq. 1).

218

219

$$\Delta S = |\Delta f_{dbl} / \omega|$$

**Equation 1**

220

221           Where  $\Delta f_{dbl}$  describes the contrast in von Kries corrected double cone stimulation  
222 between the stimulus ( $f_t$ ) and its background ( $f_b$ ), calculated as per equation 4 in Siddiqi *et. al*  
223 (2004) (Eq. 2) in relation to the weber fraction ( $\omega$ ) of the double cone channel. When using the  
224 natural logarithm of the quantum catches  $\omega = e_i$

225

$$\Delta f_{dbl} = \ln(f_t) - \ln(f_b) \qquad \text{Equation 2}$$

227

228           A total of 6 stimuli were created for each scenario (Fig. 2, Table 1).

## 229 **Experimental setup**

230           Aquaria were divided in two halves by a removable grey, opaque PVC partition. This  
231 enabled the fish to be separated from the testing arena while the stimuli were set up. Stimuli  
232 were displayed on vertical, grey, PVC boards and placed against one end of the aquaria. Tanks  
233 were illuminated using the same white LED lights (EcoLight KR96 30W) used for stimulus  
234 calibration. To ensure equal light levels in all tanks, sidewelling absolute irradiance was measured  
235 using a calibrated OceanOptics USB2000 spectrophotometer, a 180° cosine corrector and a  
236 400nm optic fibre cable fixed horizontally in the tank (Suppl. Material).

## 237 **Animal training**

238           Fish were trained to peck at the target dot using a classic conditioning approach. First, fish  
239 were trained to pick a small piece of squid off a black or white (randomly chosen) spot (1.6 cm

240 diam) on the grey background corresponding to the treatment group ('bright' or 'dark', Table 1).  
241 We trained the fish to detect target spots on both brighter and darker backgrounds to reduce  
242 hypersensitivity through anticipation by applying the principle of 'constant stimuli' thresholds  
243 (Colman, 2008; Laming and Laming, 1992; Pelli and Bex, 2013). We will be referring to stimuli with  
244 greater luminance than their background as bright or brighter to facilitate reading. However, the  
245 perception of luminance is complex, and the term brightness means specifically the perception  
246 of surface luminance is often used wrongly and/or in confusion with lightness which refers to the  
247 perception of surface reflectance (Kingdom, 2011). Training fish to react to stimuli being either  
248 brighter or darker intended to produce thresholds more closely related to a natural context, as  
249 prey items in the natural environments can be both brighter and darker than their natural  
250 background. Second, once fish consistently removed the food reward from the black and white  
251 target spots, a second food reward was presented from above using forceps. Once fish were  
252 confident with this, the final stage of training was a food reward given from above once they had  
253 tapped at the target stimulus (without food). Training consisted of up to two sessions per day,  
254 with six to ten trials per session. Fish moved to the testing phase when fish were successful in  
255 performing the task in > 80% trials over at least 6 consecutive sessions. A trial was considered  
256 unsuccessful if the fish took longer than 90 seconds to make a choice or if it pecked at the  
257 background more than twice. Testing was suspended for the day if the fish showed multiple  
258 timeouts for obviously easy contrasts, assuming the fish was not motivated to perform the task.  
259 However, this occurred rarely (<1% of trials) with smaller fish being more susceptible to having  
260 been fed enough to lose appetite.

261

## 262 **Animal testing**

263           We randomly allocated fish into two groups: Group 1 ( $n = 7$ ) had to find and peck at target  
264 spots that were brighter ( $T_{bd}$ ) or darker ( $T_{dd}$ ) than a relatively dark background; Group 2 ( $n = 8$ )  
265 had to find and peck target spots that were brighter ( $T_{bb}$ ) or darker ( $T_{db}$ ) than a relatively bright  
266 background (Fig. 2, Table 1). As with the training of the animals, the target spots were presented  
267 in a random position against an A4 sized achromatic background in two sessions per day  
268 consisting of 6-10 trials per session depending on the appetite of the fish. The trials for each  
269 session were chosen pseudo-randomly from all possible contrasts, thus fish were presented with  
270 both darker and brighter spots compared to their background in each session. Each stimulus was  
271 presented a minimum of 6 times (Table 1). We ensured that both easier and harder contrast  
272 stimuli were presented in each session to maintain fish motivation. Motivation was considered  
273 low when the animal did not engage in the trial immediately, and if this occurred, trials were  
274 ceased for that fish until the next session. However, this rarely occurred and was further  
275 minimised by carefully avoiding overfeeding the animals. As per training, trial was considered  
276 unsuccessful if the fish took longer than 90 seconds to make a choice or if it pecked at the  
277 background more than twice. Wrong pecks were recorded and time to detection was recorded as  
278 the time between the moment the fish moved past the divider and the successful peck at the  
279 target spot.

280

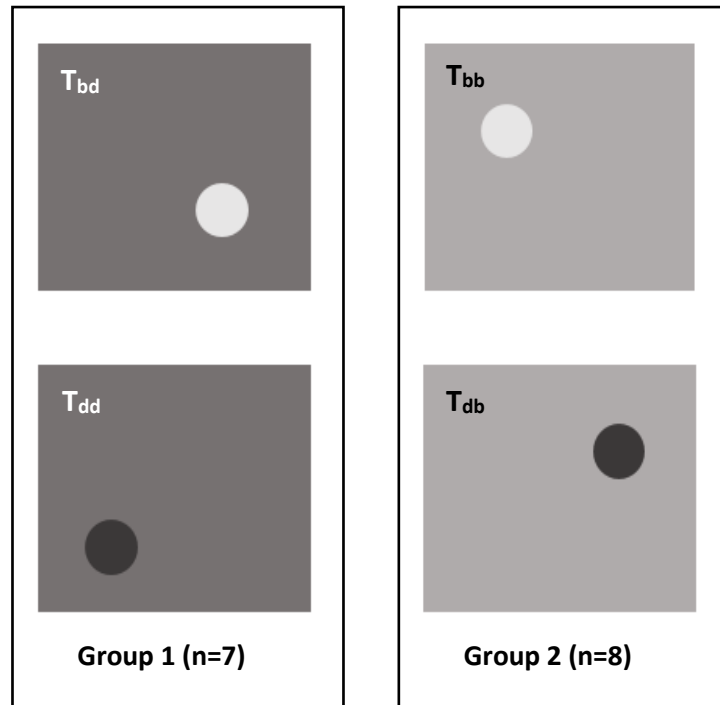

**Figure 2:** Schematic representation of detection scenarios. Figure proportions are not to scale. Group 1 (dark background) and group 2 (bright background) are shown with darker and brighter target spots with the maximum contrast used in the experiment. The top left of each scenario shows the corresponding abbreviation.  $T_{bd}$  = bright spot on dark background,  $T_{dd}$  = dark spot on dark background,  $T_{bb}$  = bright spot on bright background,  $T_{db}$  = dark spot on bright background. Background were A4 size and the spots 1.6cm in diameter, randomly placed of each trial.

282

| <b>Group 1 (dark background, n = 7)</b> |                              | <b>Group 2 (bright background, n = 8)</b> |                              |
|-----------------------------------------|------------------------------|-------------------------------------------|------------------------------|
| [ΔS] / [Michelson Contrast]             |                              | [ΔS] / [Michelson Contrast]               |                              |
| (median trials per fish ± sd)           |                              | (median trials per fish ± sd)             |                              |
| Bright Spot (T <sub>bd</sub> )          | Dark Spot (T <sub>dd</sub> ) | Bright Spot (T <sub>bb</sub> )            | Dark Spot (T <sub>db</sub> ) |
| 15.34 / 0.37*<br>(6.0 ± 0.5)            | 9.26 / 0.23*<br>(7.0 ± 1.1)  | 17.87 / 0.42*<br>(8.5 ± 1.5)              | 15.51 / 0.37*<br>(9.0 ± 1.8) |
| 5.98 / 0.15<br>(8.0 ± 1.3)              | 6.55 / 0.16<br>(6.0 ± 0.4)   | 8.84 / 0.22<br>(8.5 ± 1.8)                | 7.99 / 0.20<br>(8.0 ± 1.3)   |
| 4.82 / 0.12<br>(6.0 ± 0.5)              | 5.04 / 0.13<br>(8.0 ± 1.7)   | 5.19 / 0.13<br>(7.5 ± 0.9)                | 5.92 / 0.15<br>(8.5 ± 1.5)   |
| 3.94 / 0.10<br>(8.0 ± 1.5)              | 3.03 / 0.08<br>(9.0 ± 1.5)   | 3.98 / 0.10<br>(9.0 ± 1.7)                | 4.65 / 0.12<br>(8.5 ± 1.3)   |
| 2.34 / 0.06<br>(8.0 ± 1.2)              | 1.24 / 0.03<br>(9.0 ± 1.6)   | 1.82 / 0.05<br>(8.0 ± 1.3)                | 2.46 / 0.06<br>(6.0 ± 1.6)   |
| 0.58 / 0.01<br>(7.0 ± 1.1)              | 0.89 / 0.02<br>(9.0 ± 1.6)   | 0.84 / 0.02<br>(6.5 ± 1.0)                | 1.58 / 0.04<br>(7.0 ± 1.4)   |

**Table 1:** Summary of all stimulus contrasts across both groups in ΔS and Michelson contrast. Number of trials per fish are indicated in brackets below each stimulus contrast.

283



## 284 **Statistical analysis**

285 Psychometric curves were fitted to the data with % correct choice per stimulus as the  
286 response variable and stimulus contrast measured in Michelson contrast as the independent  
287 variable, using the R package *quickpsy* (Linares and Lopez-Moliner, 2015; R Core Team, 2015). The  
288 best model fit (cumulative normal or logistic) was determined using the lowest AIC as per Yssaad-  
289 Fesselier & Knoblauch (2006) and Linares & Lopez-Moliner (2015) and is expressed both  
290 individually for each scenario as well as the sum across all scenarios. We interpolated the 50%  
291 correct choice thresholds with a 95% confidence interval from these curves. Thresholds between  
292 the fitted curves for each scenario were compared as per Jörges *et al.* (2018) using the Bootstrap  
293 (Boos, 2003) implemented in *quickpsy* (100 permutations). The Bonferroni method (Bland and  
294 Altman, 1995) was used to adjust the significance level of the confidence intervals to  $1-0.05/n$ ,  
295 with  $n$  corresponding to the number of comparisons.

296

## 297 **Results**

298 A total of 1365 trials were conducted across all animals and treatments (Table 1). The total success  
299 rate was 68.5% across all 24 stimuli with a median ( $\pm$  sd) time to detection of  $3.1 \pm 12.6$  s with the  
300 fastest success at 0.3 seconds and the slowest at 89.9 s. The median time for successful detection  
301 was similar across all scenarios ( $\pm$  sd):  $T_{dd} = 2.9 \pm 12.9$  s,  $T_{bd} = 2.8 \pm 10.8$  seconds,  $T_{db} = 3.1 \pm 13.5$  s,  
302  $T_{bb} = 3.22 \pm 12.58$  s.

303 Detection thresholds (50% correct choice) for all scenarios are presented in Figure 3 and  
304 Table 2. The sum of AIC across all four detection scenarios (fit = cumulative normal) was 162.4  
305 ( $T_{dd} = 24.2$ ,  $T_{bd} = 50.8$ ,  $T_{bb} = 50.1$ ,  $T_{db} = 37.3$ ). In group 1 (dark background), the detection thresholds

306 for the bright and dark spot were not significantly different from each other, with the threshold  
307 for detecting a spot brighter than a dark background being slightly higher than a spot darker than  
308 a dark background ( $T_{bd} - T_{dd} = 0.007 \text{ MC}$ ,  $CI_{diff} [0.002 / 0.017]$ ). However, the detection thresholds  
309 in group 2 (bright background) were significantly different from each other, with the threshold  
310 for detecting a dark spot against a bright background being significantly lower than the threshold  
311 for detecting a bright spot against a bright background ( $T_{db} - T_{bb} = -0.028 \text{ MC}$ ,  $CI_{diff} [0.014 / 0.041]$ ).

312 While the threshold for detecting a bright spot against a dark background was not  
313 different from that for detecting a dark spot against a bright background (its 'inverse' scenario)  
314 ( $T_{bd} - T_{db} = -0.003$ ,  $CI_{diff} [-0.013 / -0.016]$ ) all other detection thresholds varied significantly from  
315 each other when compared across group 1 & 2 (Fig. 3 & 4, Table 2).

316

317

318

319

320

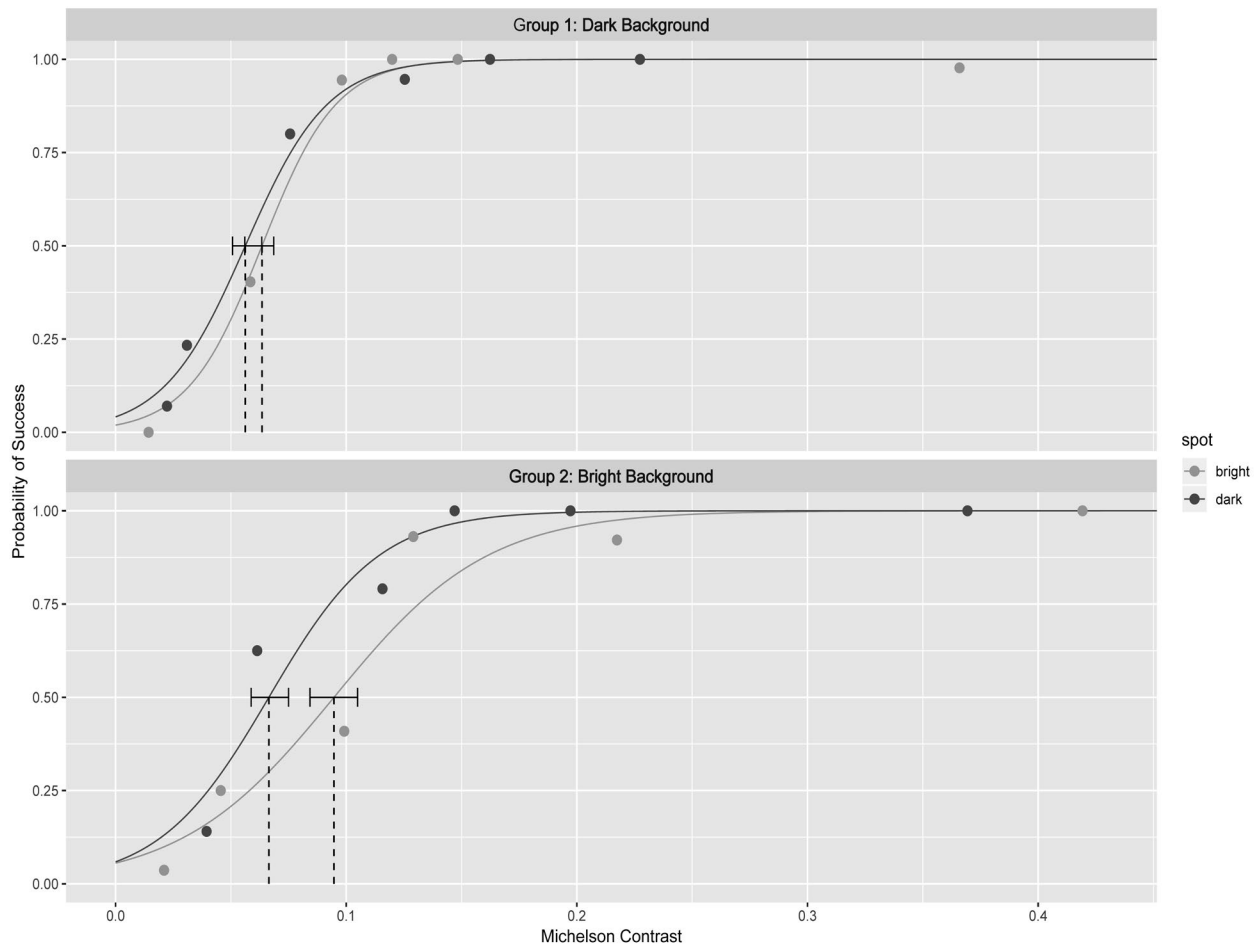

**Figure 3:** 50% probability of a fish successfully pecking a target spot. Estimated using a logistic regression fitted to the detection data. Thresholds for each scenario in Michelson contrast, error bars represent the 95% confidence intervals.

321

322

323

324  
325  
326  
327  
328  
329  
330  
331  
332

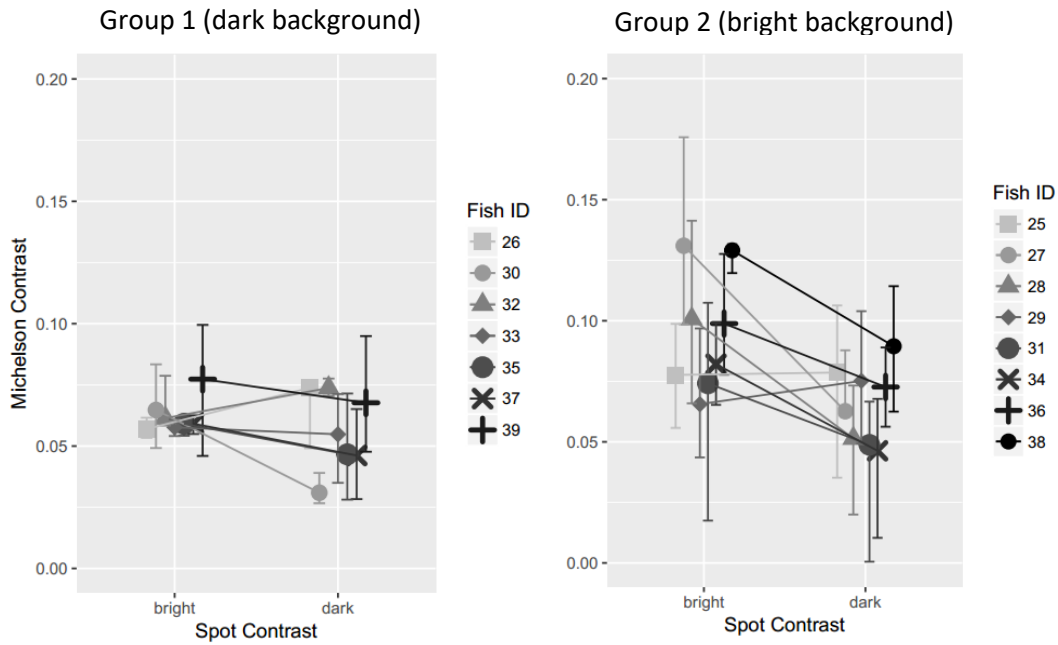

**Figure 4:** Detection thresholds for individual fish. Individually estimated discrimination thresholds in Michelson contrast for each scenario. Error bars represent the 95% confidence intervals.

333

|          |         | Scenario<br>Significance (MC / $\Delta S$ )                                                    | Michelson Contrast<br>(95% CI) | Weber Contrast<br>(95% CI) | $\Delta S$<br>(95% CI) |
|----------|---------|------------------------------------------------------------------------------------------------|--------------------------------|----------------------------|------------------------|
| $T_{bd}$ | Group 1 | (abd / a)<br> | 0.063 (0.057-0.071)            | 0.313 (0.282-0.349)        | 2.543 (2.286-2.831)    |
| $T_{dd}$ |         | (b / a)<br>   | 0.056 (0.051-0.063)            | 0.278 (0.241-0.309)        | 2.252 (1.955-2.510)    |
| $T_{bb}$ | Group 2 | (c / b)<br>  | 0.095 (0.086-0.104)            | 0.322 (0.287-0.354)        | 3.799 (3.379-4.118)    |
| $T_{db}$ |         | (d / a)<br> | 0.066 (0.060-0.073)            | 0.226 (0.197-0.253)        | 2.662 (2.317-2.979)    |

334

335

336 **Table 2:** Summary of results for the 50% correct choice threshold contrasts. Letters above scenario drawings  
 337 indicate significant differences in MC thresholds as per bootstrap sampling (letters on the left) or a 1  $\Delta S$  RNL  
 338 contrast (letters on the right).

338

## 339 Discussion

340 Our study demonstrates that for triggerfish, *Rhinecanthus aculeatus*, the ability to  
341 discriminate a large, well-illuminated achromatic stimulus against a uniform achromatic  
342 background depends on both the relative luminance contrast between target and background ( $f_t$   
343 vs.  $f_b$ ) as well as the absolute luminance level ( $f_t + f_b$ ) at which the contrast is perceived (eq. 2).  
344 For example, discrimination thresholds, measured as Michelson contrast (MC), were significantly  
345 lower when fish were presented with a bright spot against a dark background, as opposed to a  
346 bright spot against a bright background (Table 2). However, when expressed in terms of Weber  
347 contrast (i.e. scaling the contrast with the luminance level at which the luminance contrast is  
348 perceived) these two thresholds were almost identical (Table 2). This finding supports the Weber-  
349 Fechner law that states the ability to discriminate a target stimulus against its background scales  
350 with the intensity at which the discrimination is made. The same holds true for the discrimination  
351 thresholds of dark spot against a dark background ( $T_{dd}$ ) as opposed to a bright background ( $T_{db}$ ),  
352 which have an almost identical Weber contrast (Table 2). Furthermore, the contrast sensitivity  
353 depends on the direction of the contrast ( $f_t > f_b \neq f_t < f_b$ ), that is, the Weber contrast for detecting  
354 stimuli darker than their respective backgrounds is lower (= more sensitive) from that for stimuli  
355 which are brighter than their backgrounds (WC 0.23 – 0.28 for dark spots and 0.31 – 0.32 for  
356 bright ones) (Table 2).

357 Our results agree with previous findings that humans (e.g. Bowen, Pokorny, & Smith,  
358 1989; Emran et al., 2007; Lu & Sperling, 2012), non-human vertebrates (e.g. Baylor et al., 1974),  
359 and invertebrate visual systems (e.g. Smithers et al., 2019) are consistently better at detecting  
360 darker stimuli. Increasing and decreasing luminance changes are thought to be processed

361 differently: darker stimuli are detected by off-centre ganglion cells, while lighter ones are  
362 detected by on-centre ganglion cells (Schiller et al., 1986). Dark stimuli cause depolarization of  
363 photoreceptors, whereas light ones are detected as hyperpolarization (Baylor et al., 1974). For  
364 example, investigation of turtle photoreceptors has shown that dark stimuli result in much  
365 greater depolarization of photoreceptors, than the magnitude of hyperpolarization resulting from  
366 light ones (Baylor et al., 1974). This asymmetry is thought to be a crucial contributor to object and  
367 motion detection in post-retinal processing (e.g. Oluk et al., 2016; Vidyasagar and Eysel, 2015).

### 368 **Behavioural calibration of the RNL**

369 The relationship of absolute (background + stimulus) and relative luminance (background  
370 vs. stimulus) contrast does not hold when expressing thresholds as achromatic  $\Delta S$  (Table 2). The  
371 exclusion of signal intensity is a fundamental assumption when calculating chromatic contrasts  
372 using the RNL model (Vorobyev and Osorio, 1998), which was designed to quantify contrast  
373 perception between two closely opposed chromatic stimuli viewed against an achromatic  
374 background. As a result, the RNL equations used by Siddiqi et al. (2004) calculate a relative  
375 comparison of two background adapted receptor responses without scaling the difference in  
376 photoreceptor stimulation between stimulus and background in relation to the overall brightness  
377 of a scene. Thus, the commonly used RNL equations in Siddiqi *et al.* (2004) fail to reflect the  
378 Weber-Fechner law for the discrimination of a stimulus from its background. Olsson et al. (2018)  
379 proposed the use of an adaptation where the Weber contrast at the behaviourally determined  
380 discrimination threshold ( $WC_t$ ) should be used in place of the receptor noise:

$$381 \quad \Delta S = |\Delta f_{dbl}/WC_t| \quad \text{Equation 3}$$

382 This renders the following  $\Delta S$  values at threshold:  $T_{dd} = T_{bd} = 0.41 \Delta S \pm 0.0001$  and  $T_{bb} = T_{db}$   
383  $= 0.59 \Delta S \pm 0.001$  using the WC determined in this experiment. This makes the RNL model, as  
384 modified by Olsson et al. 2018, conform with the Weber-Fechner law while preserving the  
385 difference in contrast sensitivity regarding increments and decrements. Furthermore, the  
386 thresholds are well below  $1 \Delta S$ , making the assumption of a 'Just Noticeable Difference' (JND)  
387 corresponding to a threshold of  $1 \Delta S$  a comfortably conservative (but not extreme) threshold. It  
388 should be noted that the general conclusions of Siddiqi et al., (2004) remain most likely correct,  
389 but we can now realise a closer description of the underlying mechanisms.

390 Olsson et al. (2018) propose the use of Michelson contrast (MC) in place of receptor noise  
391 in order to estimate the channel specific noise ( $e_i$ ). First, the contrast sensitivity (CS) is calculated  
392 as the inverse of the behaviourally determined Michelson Contrast ( $C_t$ ):

393 
$$CS = \frac{1}{C_t} \quad \text{Equation 4}$$

394 Next, this CS (which is sensitive to the absolute level of luminance as our results confirm)  
395 can be used to calculate the relative quantum catch of stimulus 2 ( $q_{stim2}$ ):

396 
$$q_{stim2} = \frac{1 - C_t}{1 + C_t} \quad \text{Equation 5}$$

397 We can then use  $q_{stim2}$  as  $f_t$  and our originally measured  $f_b$  in eq. 2 to derive the channel  
398 noise ( $e_i$ ) (see Olsson et al. 2018 for further details). With the assumption of  $\Delta S = 1$  at threshold,  
399 this produces:

400 
$$e_i = \ln \frac{\Delta S}{q_{stim2}} \quad \text{Equation 6}$$



401            Thus, we obtain the following channel noise estimates ( $e_i \pm 95\%$  CI):  $e_{Tdd} = 0.113$  (0.098 –  
402 0.125) &  $e_{Tbd} = 0.127$  (0.114 – 0.142) for group 1 (dark background) and  $e_{Tdb} = 0.133$  (0.116 –  
403 0.149) &  $e_{Tbb} = 0.190$  (0.169 – 0.209) for group 2 (bright background). This is the same as setting  
404  $\omega$  (which is equal to  $e_i$ ) in eq. 1 so that the observed  $\Delta S$  in our experiments (Table 2) would be  
405 equal to 1 (as we determined  $f_t$  at threshold by fitting a model to the observed MC). This is  
406 interesting, as these noise values are up to almost 4 times as high as the ‘conservative’ (!) standard  
407 deviation of noise estimate of 0.05, currently used for modelling vertebrate vision across the field  
408 of visual ecology.

409            Given that WC is meant to be used for comparably small stimuli against large backgrounds  
410 and MC to be used for contrasts between stimuli of comparable size, we recommend a  
411 differentiated use of either equation 3 or 4-6 depending on the visual context in which a  
412 discrimination threshold is used. For example, as the scenario in this study involved the  
413 discrimination of a single spot against a much larger background, we would assume equation 3 to  
414 be more relevant than equations 4-6 (e.g. equations 4-6 still produce a higher noise ratio for  
415 Group 2 (bright background), especially  $T_{bb}$ ). Thus, equations 4-6 would likely be more relevant  
416 when discriminating between two objects of equal size. This further implies that one could plot  
417 the discrimination curves as a function of WC rather than MC to obtain the discrimination  
418 threshold. The thresholds would then only be distinguishable based on the relative direction of  
419 the contrast (bright spot or dark spot) and not the background intensity (Table 2). It also implies  
420 that thresholds obtained from experiments using a discrimination scenario more fitting to  
421 equations 4-6 (e.g. Lind et al., 2013) should not be used to infer the detectability of most likely  
422 relatively small prey items against their most likely large visual backgrounds.

## 423 **Future directions**

424           The specific mechanisms causing the observed difference in WC between the detection of  
425 a dark spot and a bright spot (or mathematical approximations thereof), or an explanation as to  
426 why *e\_achromatic* is much higher than the conservatively chosen receptor noise of 0.05, remain  
427 speculative. Further investigations might seek advances in the understanding of  
428 neurophysiological mechanisms underlying luminance contrast perception in *R. aculeatus*. These  
429 include knowledge of the detailed anatomy and receptor noise of double cone photoreceptors,  
430 the relative contribution of each double-cone member to luminance contrast sensitivity (Siebeck  
431 et al., 2014) as well as the precise mechanism by which photoreceptor stimulation is integrated  
432 in post-receptor structures such as edge detecting receptive fields. Behavioural experiments with  
433 closely related species with different retinal morphologies would be of interest to further  
434 investigate e.g. the role of retinal neuroanatomy on luminance contrast perception.

435           The adaptations to the RNL model in Olsson et al. (2018), while apparently effective, do  
436 not account for the effects of spatial frequency on luminance contrast sensitivity when  
437 discriminating objects against visual backgrounds. This is probably the most notable confounding  
438 effect on low-level processing of luminance contrast as a result of post-receptor lateral-inhibition  
439 (Veale et al., 2017). One possible approach would be the use of contrast sensitivity functions (CSF)  
440 to scale Weber fractions as a function of spatial frequency in a visual scene. However, given that  
441 these are determined using a perceptually different experimental setup (da Silva Souza et al.,  
442 2011) this should be investigated using context specific behavioural experimentation.

443           Our results warrant caution in the use of uniform contrast sensitivity thresholds (be it  
444 achromatic or chromatic) across widely diverse perceptual contexts, independently of which

445 models are used to describe them. Luminance discrimination, as expected, is not just limited by  
446 photoreceptor noise and therefore cannot be adequately represented by the use of a singular  
447 detection or discrimination threshold determined using the equations in Siddiqi et al. (2004) as  
448 currently common in behavioural ecology studies. This realisation shares many parallels with  
449 ongoing discussions regarding the use of the RNL model outside of model assumptions (Marshall,  
450 2018; Olsson et al., 2018; Osorio et al., 2017; Sibeaux et al., 2019; Stuart-Fox, 2018; Vasas et al.,  
451 2018). Our results suggest the use of conservative achromatic RNL threshold assumption of  $3\Delta S$   
452 (e.g. Spottiswoode & Stevens, 2010) without adaptations such as those proposed by Olsson et al.  
453 (2018) might warrant caution.

454         We show that the noise in the achromatic channel of *R. aculeatus* can be substantially  
455 higher than anticipated in previous studies modelling its luminance contrast sensitivity using  
456 ‘conservative’ receptor noise estimates. However, this increase in channel noise ( $e_i$ ) can be  
457 originating from many potential sources, including electrophysiological coupling of receptors in  
458 the double cone of *R. aculeatus* (but also a generally higher noise level in receptor responsible for  
459 luminance contrast detection) or downstream (post-receptor) processing of visual information.  
460 As such it is wrong to conclude receptor noise from such behavioural calibration (Vasas et al.,  
461 2018) and it would be more appropriate to refer to the noise of the entire pathway involved in  
462 the performance of a task based on the animal’s ability to perceive luminance contrast in a  
463 specific visual context.

464         Despite having investigated luminance contrast sensitivity using two different levels of  
465 background luminance, our study only considered discrimination of large, uniform and  
466 achromatic circular target stimulus against a uniform grey background. In future studies, more

467 realistic backgrounds and illumination should be taken into account (e.g. Matchette et al., 2020),  
468 as a variety of factors can fundamentally influence luminance contrast perception in most  
469 circumstances (Gilchrist, 2014; Gilchrist and Radonjic, 2009; Gilchrist et al., 1999; Kingdom, 2011;  
470 Maniatis, 2014). Unsurprisingly then, there is evidence that luminance contrast modulates the  
471 salience of objects at stages well beyond the retina (Einhäuser and König, 2003).

## 472 **Summary**

473 Our findings provide insight into the processing of achromatic information as well as the  
474 use of the RNL model to quantify achromatic discrimination by non-human observers. We show  
475 that the current use of the RNL model for the quantification of luminance contrast sensitivity  
476 thresholds warrants caution. More specifically, our study suggests the lack of adequate scaling of  
477 thresholds by the RNL model to the average luminance of a scene and the need for context  
478 specific behavioural experimentation whenever possible.

479 One of the main reasons why researchers use the RNL model is that, presumably, the  
480 discriminability of visual contrasts can be reliably predicted by using a set of conservatively  
481 estimated physiological parameters such as photoreceptor noise, abundance and spectral  
482 sensitivity. While this seems to work satisfyingly well for colour contrast perception across a range  
483 of animals, our study suggests quite the opposite to be the case for achromatic contrast. Despite  
484 the possibility of calibrating the RNL using contextualised behavioural experiments (as suggested  
485 by Olsson et al. 2018), the result remains unsatisfying. However, we recommend the use of  
486 behaviourally determined discrimination thresholds suitable to the given visual context in which  
487 they are to be applied as well as generous caution when predicting the discriminability of  
488 luminance contrast.

489 Our study indeed suggests that one cannot reliably use the RNL to predict achromatic  
490 contrast perception without context specific behavioural experimentation. This has direct  
491 implications on the design of behavioural experiments where validated discrimination thresholds  
492 are unavailable. For example, given the difficulty of predicting luminance discriminability,  
493 luminance contrast should be thoroughly randomised (as opposed to attempting iso-luminance  
494 between stimuli) in any behavioural experiment than can potentially be influenced by luminance  
495 contrast perception.

496

## 497 **Contributions**

498 Cedric P. van den Berg conceived and conducted the study and wrote the manuscript. Laurie J.  
499 Mitchell, Michelle Hollenkamp and Erin Watson assisted with training and testing of the animals.  
500 Karen L. Cheney, Naomi F. Green and N. Justin Marshall helped review the document.

501

## 502 **Acknowledgements**

503 We would like to thank Natalie Meiklejohn for assisting with experiments and data entry, Ama  
504 Wakwella for preliminary experimentation and many volunteers for assisting with animal  
505 husbandry, Almut Kelber, Anna Hughes & Simon Laughlin for valuable discussions and William  
506 Allen & Nick Scott-Samuel for valuable feedback on the manuscript.

507

## 508 **Funding**

509 This study was funded by an ARC Discovery Grant DP150102710 awarded to Karen Cheney and  
510 N. Justin Marshall.

511

## 512 **Conflict of interest**

513 We declare to have no conflicting interests.

514

## 515 **References**

516 **Anderson, B. L.** (2011). Visual perception of materials and surfaces. *Curr. Biol.* **21**, R978-83.

517 **Baylor, D. A., Hodgkin, A. L. and Lamb, T. D.** (1974). The electrical response of turtle cones to  
518 flashes and steps of light. *J. Physiol.* **242**, 685–727.

519 **Bex, P. J. and Makous, W.** (2002). Spatial frequency, phase, and the contrast of natural images.  
520 *J. Opt. Soc. Am. A* **19**, 1096.

521 **Bland, j. M. and Altman, D. G.** (1995). Statistics notes: Multiple significance tests: the  
522 Bonferroni method. *BMJ* **310**, 170–170.

523 **Boos, D. D.** (2003). Introduction to the Bootstrap World. *Stat. Sci.* **18**, 168–174.

524 **Bowen, R. W., Pokorny, J. and Smith, V. C.** (1989). Sawtooth contrast sensitivity: decrements  
525 have the edge. *Vision Res.* **29**, IN1-1509.

526 **Brooks, J. L.** (2014). *Traditional and New Principles of Perceptual Grouping.* (ed. Wagemans, J.)  
527 Oxford University Press.

528 **Bruce, V., Green, P. R., Georgeson, M. A. and Dynan, L.** (2010). *Visual perception: physiology,*

- 529 *psychology, & ecology*. Fourth edi. Hove, England ; New York, New York: Psychology Press.
- 530 **Caves, E. M. and Johnsen, S.** (2018). AcuityView: An r package for portraying the effects of  
531 visual acuity on scenes observed by an animal. *Methods Ecol. Evol.* **9**, 793–797.
- 532 **Champ, C., Wallis, G., Vorobyev, M., Siebeck, U. and Marshall, J.** (2014). Visual acuity in a  
533 species of coral reef fish: *Rhinecanthus aculeatus*. *Brain. Behav. Evol.* **83**, 31–42.
- 534 **Champ, C. M., Vorobyev, M. and Marshall, N. J.** (2016). Colour thresholds in a coral reef fish. *R.*  
535 *Soc. Open Sci.* **3**, 160399.
- 536 **Cheney, K. L. and Marshall, N. J.** (2009). Mimicry in coral reef fish: how accurate is this  
537 deception in terms of color and luminance? *Behav. Ecol.* **20**, 459–468.
- 538 **Cheney, K. L., Newport, C., McClure, E. C. and Marshall, N. J.** (2013). Colour vision and response  
539 bias in a coral reef fish. *J. Exp. Biol.* **216**, 2967–2973.
- 540 **Cheney, K. L., Green, N. F., Vibert, A. P., Vorobyev, M., Marshall, N. J., Osorio, D. C. and**  
541 **Endler, J. A.** (2019). An Ishihara-style test of animal colour vision. *J. Exp. Biol.* **222**,  
542 jeb189787.
- 543 **Colman, A. M.** (2008). *A Dictionary of Psychology*. Oxford University Press.
- 544 **Corney, D. and Lotto, R. B.** (2007). What are lightness illusions and why do we see them? *PLoS*  
545 *Comput. Biol.* **3**, e180.
- 546 **Cornsweet, T. N. and Pinsker, H. M.** (1965). Luminance discrimination of brief flashes under  
547 various conditions of adaptation. *J. Physiol.* **176**, 294–310.
- 548 **Craik, K. J. W.** (1938). The effect of adaptation on differential brightness discrimination. *J.*

- 549        *Physiol.* **92**, 406–421.
- 550        **da Silva Souza, G., Gomes, B. D. and Silveira, L. C. L.** (2011). Comparative neurophysiology of  
551        spatial luminance contrast sensitivity. *Psychol. Neurosci.* **4**, 29–48.
- 552        **Dzhafarov, E. N. and Colonius, H.** (1999). Fechnerian metrics in unidimensional and  
553        multidimensional stimulus spaces. *Psychon. Bull. Rev.* **6**, 239–268.
- 554        **Einhäuser, W. and König, P.** (2003). Does luminance-contrast contribute to a saliency map for  
555        overt visual attention? *Eur. J. Neurosci.* **17**, 1089–1097.
- 556        **Elder, J. H. and Sachs, A. J.** (2004). Psychophysical receptive fields of edge detection  
557        mechanisms. *Vision Res.* **44**, 795–813.
- 558        **Elder, J. H. and Velisavljevic, L.** (2010). Cue dynamics underlying rapid detection of animals in  
559        natural scenes. *J. Vis.* **9**, 787–787.
- 560        **Emran, F., Rihel, J., Adolph, A. R., Wong, K. Y., Kraves, S. and Dowling, J. E.** (2007). OFF  
561        ganglion cells cannot drive the optokinetic reflex in zebrafish. *Proc. Natl. Acad. Sci.* **104**,  
562        19126–19131.
- 563        **Endler, J. A.** (1991). Interactions between predator and prey. In *Behavioural Ecology* (ed. JA, K.)  
564        and NB, D.), pp. 169–196. Oxford: Blackwell Scientific.
- 565        **Escobar-Camacho, D., Taylor, M. A., Cheney, K. L., Green, N. F., Marshall, N. J. and Carleton, K.**  
566        **L.** (2019). Color discrimination thresholds in a cichlid fish: *Metriaclima benetos*. *J. Exp. Biol.*  
567        **222**, jeb201160.
- 568        **Gegenfurtner, K. R. and Kiper, D. C.** (1992). Contrast detection in luminance and chromatic



- 569 noise. *J Opt. Soc. Am. A*, **9**, 1880–1888.
- 570 **Geisbauer, G., Griebel, U., Schmid, A. and Timney, B.** (2004). Brightness discrimination and  
571 neutral point testing in the horse. *Can. J. Zool.* **82**, 660–670.
- 572 **Gilchrist, A. L.** (2008). Perceptual organization in lightness. In *Oxford Handbook of Perceptual*  
573 *Organisation*, pp. 1–25.
- 574 **Gilchrist, A.** (2014). Response to Maniatis critique of anchoring theory. *Vision Res.* **102**, 93–96.
- 575 **Gilchrist, A. L. and Radonjic, A.** (2009). Anchoring of lightness values by relative luminance and  
576 relative area. *J. Vis.* **9**, 13–13.
- 577 **Gilchrist, A., Kossyfidis, C., Bonato, F., Agostini, T., Cataliotti, J., Li, X., Spehar, B., Annan, V.**  
578 **and Economou, E.** (1999). An anchoring theory of lightness perception. *Psychol. Rev.* **106**,  
579 795–834.
- 580 **Green, N. F., Urquhart, H. H., van den Berg, C. P., Marshall, N. J. and Cheney, K. L.** (2018).  
581 Pattern edges improve predator learning of aposematic signals. *Behav. Ecol.* **29**, 1–6.
- 582 **Griebel, U. and Schmid, A.** (1997). Brightness discrimination ability in the West Indian manatee  
583 (*Trichechus manatus*). *J. Exp. Biol.* **200**, 1587–92.
- 584 **Heath, S. L., Christenson, M. P., Oriol, E., Saavedra-Weisenhaus, M., Kohn, J. R. and Behnia, R.**  
585 (2020). Circuit Mechanisms Underlying Chromatic Encoding in *Drosophila* Photoreceptors.  
586 *Curr. Biol.* **30**, 264-275.e8.
- 587 **Heinemann, E. G. and Chase, S.** (1995). A quantitative model for simultaneous brightness  
588 induction. *Vision Res.* **35**, 2007–2020.

- 589 **Hempel de Ibarra, N., Giurfa, M. and Vorobyev, M.** (2001). Detection of coloured patterns by  
590 honeybees through chromatic and achromatic cues. *J. Comp. Physiol. A Sensory, Neural,*  
591 *Behav. Physiol.* **187**, 215–224.
- 592 **Jörges, B., Hagenfeld, L. and López-Moliner, J.** (2018). The use of visual cues in gravity  
593 judgements on parabolic motion. *Vision Res.* **149**, 47–58.
- 594 **Kelber, A., Vorobyev, M. and Osorio, D. C.** (2003). Animal colour vision – behavioural tests and  
595 physiological concepts. *Biol. Rev. Camb. Philos. Soc.* **78**, S1464793102005985.
- 596 **Kingdom, F. A. A.** (2011). Lightness, brightness and transparency: A quarter century of new  
597 ideas, captivating demonstrations and unrelenting controversy. *Vision Res.* **51**, 652–673.
- 598 **Laming, D. and Laming, J.** (1992). F. Hegelmaier: On memory for the length of a line. *Psychol.*  
599 *Res.* **54**, 233–239.
- 600 **Land, E. H.** (1986). Recent advances in retinex theory. *Vision Res.* **26**, 7–21.
- 601 **Linares, D. and Lopez-Moliner, J.** (2015). quickpsy: An R package to fit psychometric functions  
602 for multiple groups. 1–11.
- 603 **Lind, O., Sunesson, T., Mitkus, M. and Kelber, A.** (2012). Luminance-dependence of spatial  
604 vision in budgerigars (*Melopsittacus undulatus*) and Bourke’s parrots (*Neopsephotus*  
605 *bourkii*). *J. Comp. Physiol. A* **198**, 69–77.
- 606 **Lind, O., Karlsson, S. and Kelber, A.** (2013). Brightness discrimination in budgerigars  
607 (*Melopsittacus undulatus*). *PLoS One* **8**, e54650.
- 608 **Lotto, R. B. and Purves, D.** (2000). An empirical explanation of color contrast. *Proc. Natl. Acad.*

- 609        *Sci.* **97**, 12834–12839.
- 610    **Lu, Z.-L. and Sperling, G.** (2012). Black-white asymmetry in visual perception. *J. Vis.* **12**, 8–8.
- 611    **Lythgoe, J. N.** (1979). *The ecology of vision*. Oxford University Press.
- 612    **Maniatis, L. M.** (2014). A theory divided: Current representations of the anchoring theory of  
613        lightness contradict the original’s core claims. *Vision Res.* **102**, 89–92.
- 614    **Marchiafava, P. L.** (1985). Cell coupling in double cones of the fish retina. *Proc. R. Soc. London.*  
615        *Ser. B. Biol. Sci.* **226**, 211–215.
- 616    **Marshall, N. J.** (2018). Do not be distracted by pretty colors: A comment on Olsson et al. *Behav.*  
617        *Ecol.* **29**, 286–287.
- 618    **Marshall, N. J., Jennings, K., McFarland, W. N., Loew, E. R. and Losey, G. S.** (2003). Visual  
619        biology of hawaiian coral reef fishes. III. Environmental light and an integrated approach to  
620        the ecology of reef fish vision. *Copeia* **2003**, 467–480.
- 621    **Marshall, K. L. A., Philpot, K. E. and Stevens, M.** (2016). Microhabitat choice in island lizards  
622        enhances camouflage against avian predators. *Sci. Rep.* **6**, 19815.
- 623    **Matchette, S. R., Cuthill, I. C., Cheney, K. L., Marshall, N. J. and Scott-Samuel, N. E.** (2020).  
624        Underwater caustics disrupt prey detection by a reef fish. *Proceedings. Biol. Sci.* **287**,  
625        20192453.
- 626    **MathWorks** (2000). Matlab.
- 627    **Mitchell, L., Cheney, K. L., Cortesi, F., Marshall, N. J. and Vorobyev, M.** (2017). Triggerfish uses  
628        chromaticity and lightness for object segregation. *R. Soc. Open Sci.* **4**, 171440.

- 629 **Monnier, P. and Shevell, S. K.** (2003). Large shifts in color appearance from patterned chromatic  
630 backgrounds. *Nat. Neurosci.* **6**, 801–802.
- 631 **Moulden, B., Kingdom, F. and Gatley, L. F.** (1990). The standard deviation of luminance as a  
632 metric for contrast in random-dot images. *Perception* **19**, 79–101.
- 633 **Newport, C., Green, N. F., McClure, E. C., Osorio, D. C., Vorobyev, M., Marshall, N. J. and**  
634 **Cheney, K. L.** (2017). Fish use colour to learn compound visual signals. *Anim. Behav.* **125**,  
635 93–100.
- 636 **Norwich, K. H.** (1987). On the theory of Weber fractions. *Percept. Psychophys.* **42**, 286–298.
- 637 **Olsson, P., Lind, O. and Kelber, A.** (2018). Chromatic and achromatic vision: parameter choice  
638 and limitations for reliable model predictions. *Behav. Ecol.* **29**, 273–282.
- 639 **Oluk, C., Pavan, A. and Kafaligonul, H.** (2016). Rapid motion adaptation reveals the temporal  
640 dynamics of spatiotemporal correlation between on and off pathways. *Sci. Rep.* **6**, 1–10.
- 641 **Osorio, D. and Vorobyev, M.** (2005). Photoreceptor spectral sensitivities in terrestrial animals:  
642 Adaptations for luminance and colour Vision. *R. Soc.* **272**, 1745–1752.
- 643 **Osorio, D. and Vorobyev, M.** (2008). A review of the evolution of animal colour vision and visual  
644 communication signals. *Vision Res.* **48**, 2042–2051.
- 645 **Osorio, D., Vorobyev, M. and Simmons, L.** (2017). Principles and application of the receptor  
646 noise model of color discrimination: A comment on Olsson et al. *Behav. Ecol.* **29**, 1–2.
- 647 **Pelli, D. G. and Bex, P.** (2013). Measuring contrast sensitivity. *Vision Res.* **90**, 10–14.
- 648 **Pignatelli, V. and Marshall, J.** (2010). Morphological characterization of retinal bipolar cells in

- 649 the marine teleost *Rhinecanthus aculeatus*. *J. Comp. Neurol.* **518**, 3117–3129.
- 650 **Pignatelli, V., Champ, C., Marshall, J. and Vorobyev, M.** (2010). Double cones are used for  
651 colour discrimination in the reef fish, *Rhinecanthus aculeatus*. *Biol. Lett.* **6**, 537–539.
- 652 **Pretterer, G., Bubna-Littitz, H., Windischbauer, G., Gabler, C. and Griebel, U.** (2004). Brightness  
653 discrimination in the dog. *J. Vis.* **4**, 10.
- 654 **R Core Team** (2015). R: A language and environment for statistical computing.
- 655 **Randall, J. E., Allen, G. R. and Steene, R. C.** (1997). *Fishes of the Great Barrier Reef and Coral*  
656 *Sea*. Crawford House Press.
- 657 **Schiller, P. H., Sandell, J. H. and Maunsell, J. H. R.** (1986). Functions of the On and Off channels  
658 of the visual system. *Nature* **322**, 824–825.
- 659 **Scholtyssek, C. and Dehnhardt, G.** (2013). Brightness discrimination in the South African fur seal  
660 (*Arctocephalus pusillus*). *Vision Res.* **84**, 26–32.
- 661 **Scholtyssek, C., Kelber, A. and Dehnhardt, G.** (2008). Brightness discrimination in the harbor  
662 seal (*Phoca vitulina*). *Vision Res.* **48**, 96–103.
- 663 **Shapley, R. and Hawken, M. J.** (2011). Color in the Cortex: single- and double-opponent cells.  
664 *Vision Res.* **51**, 701–717.
- 665 **Shevell, S. K. and Kingdom, F. A. A.** (2008). Color in Complex Scenes. *Annu. Rev. Psychol.* **59**,  
666 143–166.
- 667 **Sibaux, A., Cole, G. L. and Endler, J. A.** (2019). Success of the receptor noise model in  
668 predicting colour discrimination in guppies depends upon the colours tested. *Vision Res.*

- 669           **159**, 86–95.
- 670   **Siddiqi, A.** (2004). Interspecific and intraspecific views of color signals in the strawberry poison  
671           frog *Dendrobates pumilio*. *J. Exp. Biol.* **207**, 2471–2485.
- 672   **Siebeck, U. E., Wallis, G. M., Litherland, L., Ganeshina, O. and Vorobyev, M.** (2014). Spectral  
673           and spatial selectivity of luminance vision in reef fish. *Front. Neural Circuits* **8**, 118.
- 674   **Simmons, D. R. and Kingdom, F. A. A.** (2002). Interactions between chromatic- and luminance-  
675           contrast-sensitive stereopsis mechanisms. *Vision Res.* **42**, 1535–1545.
- 676   **Simpson, E. E., Marshall, N. J. and Cheney, K. L.** (2016). Coral reef fish perceive lightness  
677           illusions. *Sci. Rep.* **6**, 35335.
- 678   **Skorupski, P. and Chittka, L.** (2011). Is colour cognitive? *Opt. Laser Technol.* **43**, 251–260.
- 679   **Smithers, S. P., Roberts, N. W. and How, M. J.** (2019). Parallel processing of polarization and  
680           intensity information in fiddler crab vision. *Sci. Adv.* **5**, eaax3572.
- 681   **Spottiswoode, C. N. and Stevens, M.** (2010). Visual modeling shows that avian host parents use  
682           multiple visual cues in rejecting parasitic eggs. *Proc. Natl. Acad. Sci.* **107**, 8672–8676.
- 683   **Stevens, M., Parraga, C. A., Cuthill, I. C., Partridge, J. C. and Troscianko, T. S.** (2007). Using  
684           digital photography to study animal coloration. *Biol. J. Linn. Soc.* **90**, 211–237.
- 685   **Stoddard, M. C. and Stevens, M.** (2010). Pattern mimicry of host eggs by the common cuckoo,  
686           as seen through a bird’s eye. *Proc. R. Soc. B Biol. Sci.* **277**, 1387–1393.
- 687   **Stuart-Fox, D.** (2018). Opening the “black box” of modeling animal color vision: A comment on  
688           Olsson et al. *Behav. Ecol.* **29**, 284.

- 689 **Treisman, M.** (1964). Noise and Weber's law: The discrimination of brightness and other  
690 dimensions. *Psychol. Rev.* **71**, 314–330.
- 691 **Troscianko, J. and Stevens, M.** (2015). Image calibration and analysis toolbox – a free software  
692 suite for objectively measuring reflectance, colour and pattern. *Methods Ecol. Evol.* **6**,  
693 1320–1331.
- 694 **Troscianko, J., Wilson-Aggarwal, J., Stevens, M. and Spottiswoode, C. N.** (2016). Camouflage  
695 predicts survival in ground-nesting birds. *Sci. Rep.* **6**, 19966.
- 696 **van den Berg, C. P., Troscianko, J., Endler, J. A., Marshall, N. J. J. and Cheney, K. L.** (2020).  
697 Quantitative Colour Pattern Analysis (QCPA): A comprehensive framework for the analysis  
698 of colour patterns in nature. *Methods Ecol. Evol.* **11**, 316–332.
- 699 **Vasas, V., Brebner, J. S. and Chittka, L.** (2018). Color discrimination is not just limited by  
700 photoreceptor noise: a comment on Olsson et al. *Behav. Ecol.* **29**, 285–286.
- 701 **Veale, R., Hafed, Z. M. and Yoshida, M.** (2017). How is visual salience computed in the brain?  
702 Insights from behaviour, neurobiology and modelling. *Philos. Trans. R. Soc. B Biol. Sci.* **372**,  
703 20160113.
- 704 **Vidyasagar, T. R. and Eysel, U. T.** (2015). Origins of feature selectivities and maps in the  
705 mammalian primary visual cortex. *Trends Neurosci.* **38**, 475–485.
- 706 **Vorobyev, M. and Osorio, D.** (1998). Receptor noise as a determinant of colour thresholds.  
707 *Proc. R. Soc. London. Ser. B Biol. Sci.* **265**, 351–358.
- 708 **Vorobyev, M., Brandt, R., Peitsch, D., Laughlin, S. B. and Menzel, R.** (2001). Colour thresholds

709           and receptor noise: behaviour and physiology compared. *Vision Res.* **41**, 639–653.

710    **Wallach, H.** (1948). Brightness constancy and the nature of achromatic colors. *J. Exp. Psychol.*

711           **38**, 310–324.

712    **Webster, M. A. and Wilson, J. A.** (2000). Interactions between chromatic adaptation and

713           contrast adaptation in color appearance. *Vision Res.* **40**, 3801–3816.

714    **Yssaad-Fesselier, R. and Knoblauch, K.** (2006). Modeling psychometric functions in R. *Behav.*

715           *Res. Methods* **38**, 28–41.

716    **Zeki, S.** (1993). *A vision of the brain*. Oxford, England: Blackwell Scientific.

717    **Zhou, M., Bear, J., Roberts, P., Janiak, F., Semmelhack, J., Yoshimatsu, T. and Baden, T.** (2020).

718           What the Zebrafish’s eye tells the Zebrafish’s brain: Retinal ganglion cells for prey capture

719           and colour vision. *bioRxiv* 2020.01.31.927087.

720
